# Supplementary material for: A simple non-invasive method for measuring gross brain size in small live fish with semi-transparent heads
Source: PeerJ. 2014 Sep 23;2:e586. doi: 10.7717/peerj.586 (PMC4179560; doi:10.7717/peerj.586)
Supplement: Supplemental Information 1 [file peerj-02-586-s001.xlsx]

## Sheet: Readme
Label
WetW	Wet weight (g)
ForkL	Fork length (mm)
StdL
HeadL	Head length (mm)
EyeD	Eye diameter (mm)
NonOT	Non-invasive measure of optic tectum width
NonTE	Non-invasive measure of telencephalon width
NonCE	Non-invasive measure of cerebellum width
OT	Invasive measure of optic tectum width
TE	Invasive measure of telencephalon width
CE	Invasive measure of cerebellum width
W	brain weight (mg)
LnW	ln(brain weight); natural logarithm of brain weight

## Sheet: Brown Trout
WetW	ForkL	HeadL	EyeD	NonOT	NonTE	NonCE	OT	TE	CE	W	LnW
0.17	28.5	6.38	1.84	2.58	0.99	1.01	2.65	1.08	1.125	6.73	-5.00118
0.29	32.4	7.09	2.03	2.74	1.11	1.14	2.84	1.23	1.165	8.55	-4.76182
0.17	28.6	6.46	1.96	2.57	1.11	1.06	2.615	1.08	1.01	6.52	-5.03288
0.26	30.9	6.81	2.1	2.78	1.16	1.23	2.825	1.28	1.185	9.7	-4.63563
0.23	30.9	6.65	2.01	2.64	1.08	1.13	2.68	1.15	1.14	8.25	-4.79754
0.19	28.4	6.57	1.94	2.68	1.04	1.13	2.7	1.17	1.075	7.39	-4.90763
0.2	29	6.91	1.95	2.73	1.13	1.23	2.735	1.205	1.215	8.15	-4.80974
0.11	25.9	5.25	1.73	2.27	1	1.07	2.41	1.045	1.005	5.66	-5.17433
0.11	25.1	5.47	1.69	2.39	0.96	0.98	2.375	0.985	0.94	5.33	-5.2344
0.13	26.6	6.22	1.76	2.44	1	1.02	2.46	0.995	1.01	5.81	-5.14817
0.22	30.7	6.48	1.93	2.58	0.96	1	2.755	1.16	1.135	7.94	-4.83584
0.15	27.4	6.19	1.9	2.33	1.02	1.12	2.475	1.045	0.945	6.01	-5.11433
0.19	28.9	6.4	1.83	2.47	0.91	0.97	2.605	1.125	1.07	6.94	-4.97045
0.14	26.7	6.13	1.82	2.45	1.06	0.97	2.61	1.1	1.075	5.74	-5.1603
0.14	28.1	5.61	1.87	2.46	0.98	1.04	2.565	1.15	1.09	5.91	-5.13111
0.25	31.1	7.05	2.06	2.63	1.18	1.09	2.76	1.2	1.14	8.54	-4.76299
0.27	32.4	7	2.12	2.91	1.04	1.23	2.945	1.255	1.185	9.03	-4.7072
0.22	30.6	7.18	2.04	2.72	1.14	1.27	2.725	1.16	1.185	8.06	-4.82084
0.22	31.1	7.13	1.94	2.66	1.13	1.12	2.785	1.24	1.2	7.9	-4.84089
0.16	27.7	6.49	1.91	2.56	1	1.08	2.615	1.12	1.09	6.74	-4.9997
0.16	28.3	6.24	1.8	2.48	1.06	0.99	2.52	1.055	1.01	6.42	-5.04834

## Sheet: Zebrafish
WetW	ForkL	StdL	HeadL	EyeD	NonOT	OT	TE	CE	W	LnW	Comment
0.14	23.3	19.9	4.16	1.8	2.23	2.215	1.205	1.375	0.00368	-5.60484
0.17	24.9	21.1	4.39	1.81	2.185	2.175	1.28	1.385	0.00366	-5.61029
0.18	24.8	21	4.22	1.87	2.295	2.255	1.21	1.425	0.003925	-5.54039
0.16	24.6	20.8	4.44	1.94	2.32	2.305	1.28	1.485	0.004445	-5.41598
0.15	24.2	20.7	4.14	1.88	2.28	2.205	1.265	1.37	0.00349	-5.65785
0.16	25.6	21.6	4.44	1.8	2.32	2.265	1.345	1.515	0.004245	-5.46201
0.22	26.9	22.9	4.56	1.88	2.42	2.325	1.355	1.5	0.00443	-5.41936
0.11	23.7	20	4.16	1.7	2.225	2.19	1.2	1.365	0.00327	-5.72297
0.1	20.7	17.6	3.91	1.63	2.245	2.225	1.295	1.475	0.003175	-5.75245
0.19	25.9	21.9	4.7	1.84	2.385	2.29	1.35	1.49	0.00418	-5.47744
0.18	26.2	21.6	4.31	1.75	2.215	2.19	1.205	1.46	0.002955	-5.82426	Fantail
0.14	22.8	19.3	4.08	1.75				1.37	0.003105	-5.77474
0.12	22.5	19.2	3.72	1.75	2.21	2.165	1.31	1.365	0.00324	-5.73218
0.11	22.5	19	3.9	1.77	2.215	2.16	1.215	1.36	0.002935	-5.83105
0.17	26.1	21.9	4.45	1.82	2.27	2.195	1.17	1.37	0.003345	-5.70029
